# Supplementary material for: Selenium modulates cadmium-induced ultrastructural and metabolic changes in cucumber seedlings
Source: Royal Society of Chemistry journal article supplement (doi:10.1039/d0ra02866e), 2020-01-01
Supplement: d0ra02866e1.pdf [file d0ra02866e1.pdf]

**Table S1** Effect of external Se addition on Cd and Se concentration of cucumber seedlings exposed to Cd after 7 days.

| Treatment | Leaf                      |                           | Root                      |                           |
|-----------|---------------------------|---------------------------|---------------------------|---------------------------|
|           | Cd (mg kg <sup>-1</sup> ) | Se (mg kg <sup>-1</sup> ) | Cd (mg kg <sup>-1</sup> ) | Se (mg kg <sup>-1</sup> ) |
| Control   | -                         | -                         | -                         | -                         |
| Se        | -                         | 53.6 <sup>a</sup>         | -                         | 354.7 <sup>a</sup>        |
| Cd        | 44.5 <sup>a</sup>         | -                         | 1452.0 <sup>a</sup>       | -                         |
| Cd+Se     | 33.9 <sup>b</sup>         | 10.4 <sup>b</sup>         | 922.40 <sup>b</sup>       | 206.1 <sup>b</sup>        |

– , not detected.

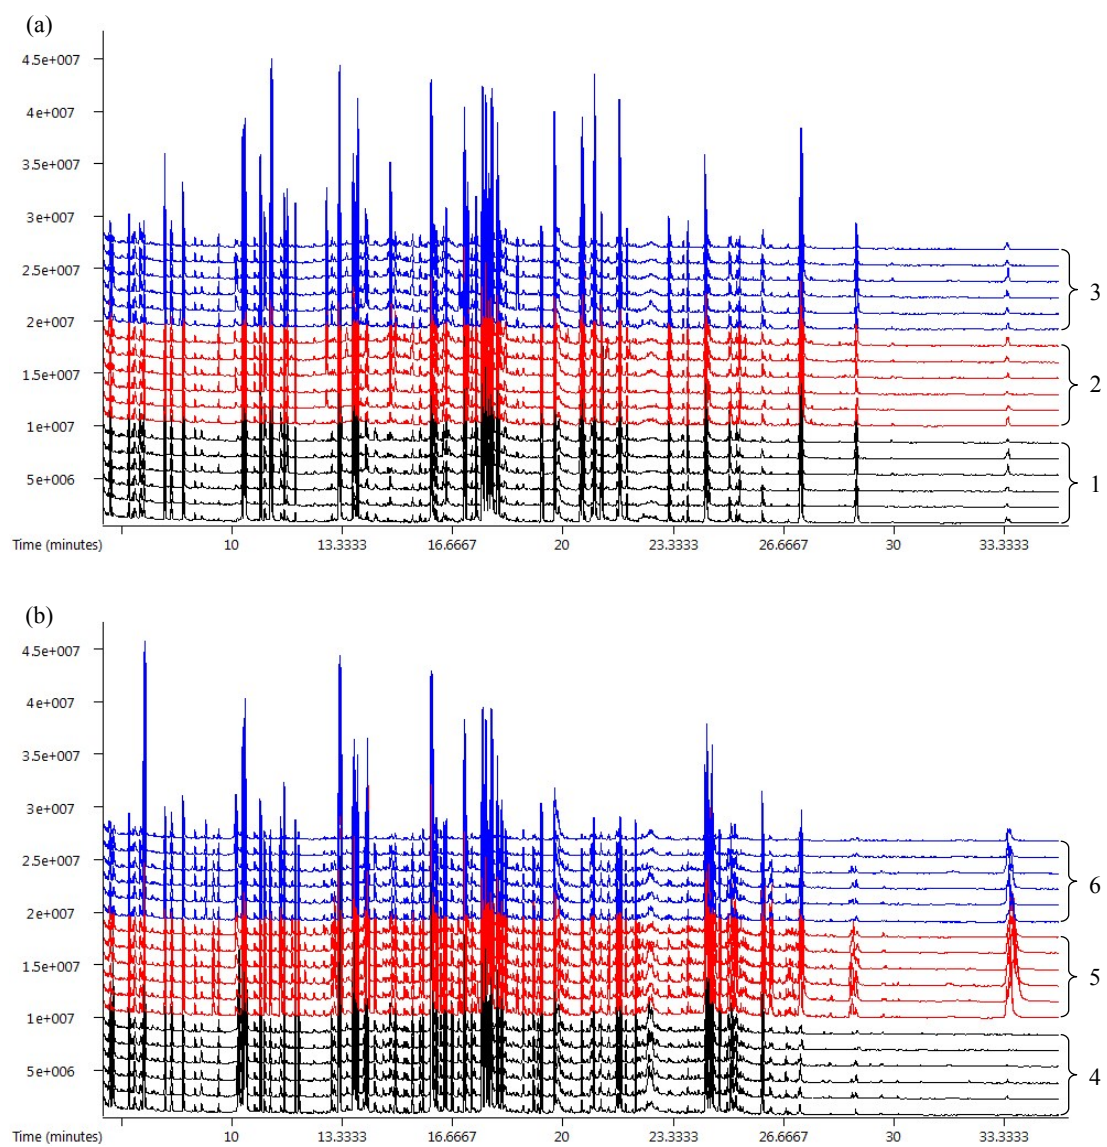

**Fig. S1** Total ion chromatogram (TIC) of the thirty-six samples of cucumber scanned based on GC-TOF/MS.

(a): leaves; (b): roots; 1 and 4: control; 2 and 5: Cd; 3 and 6: Cd+Se.

(a)

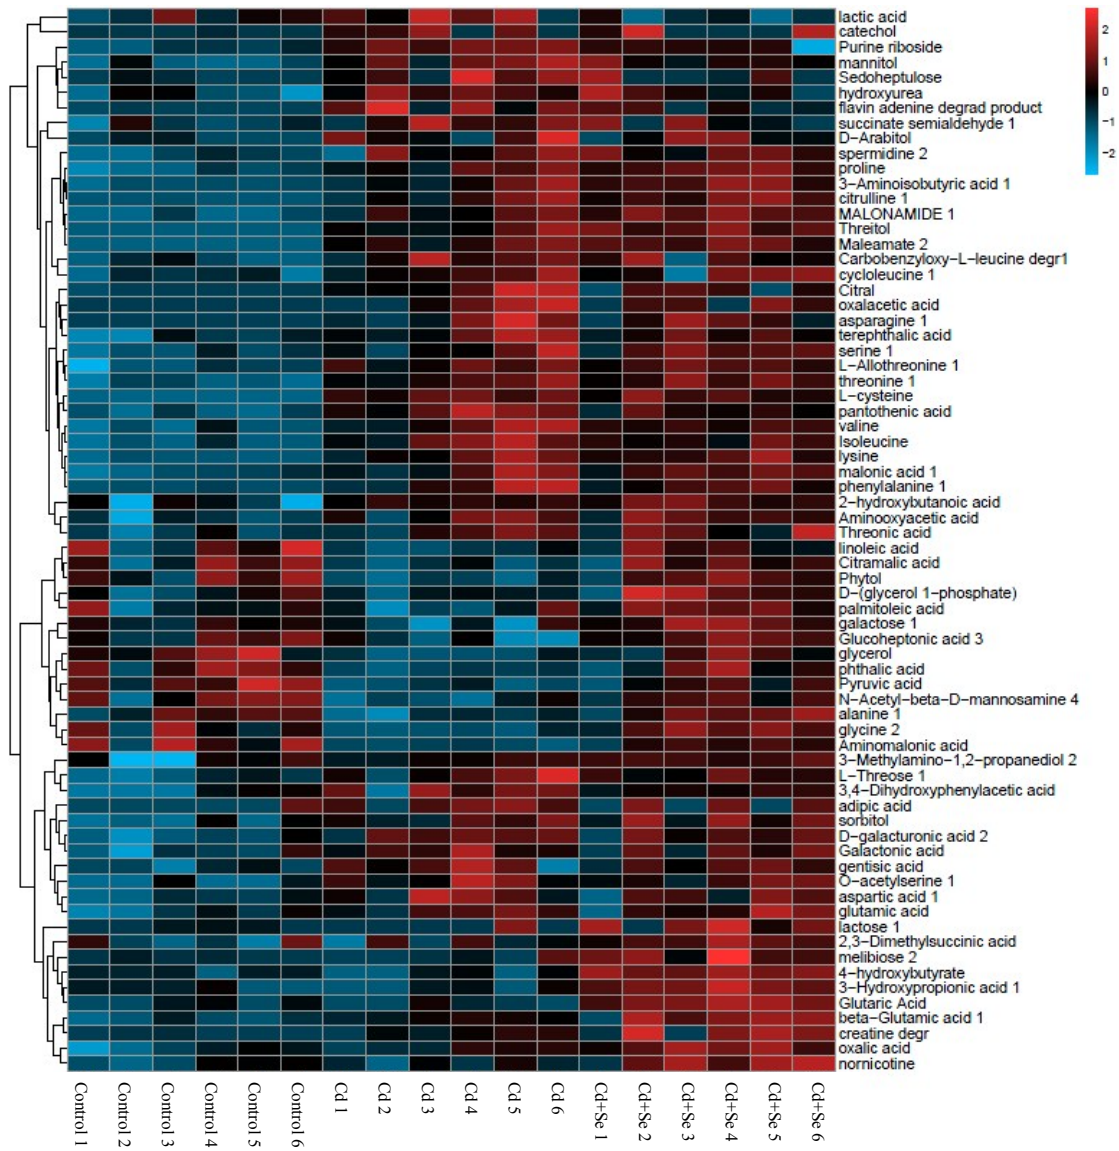

(b)

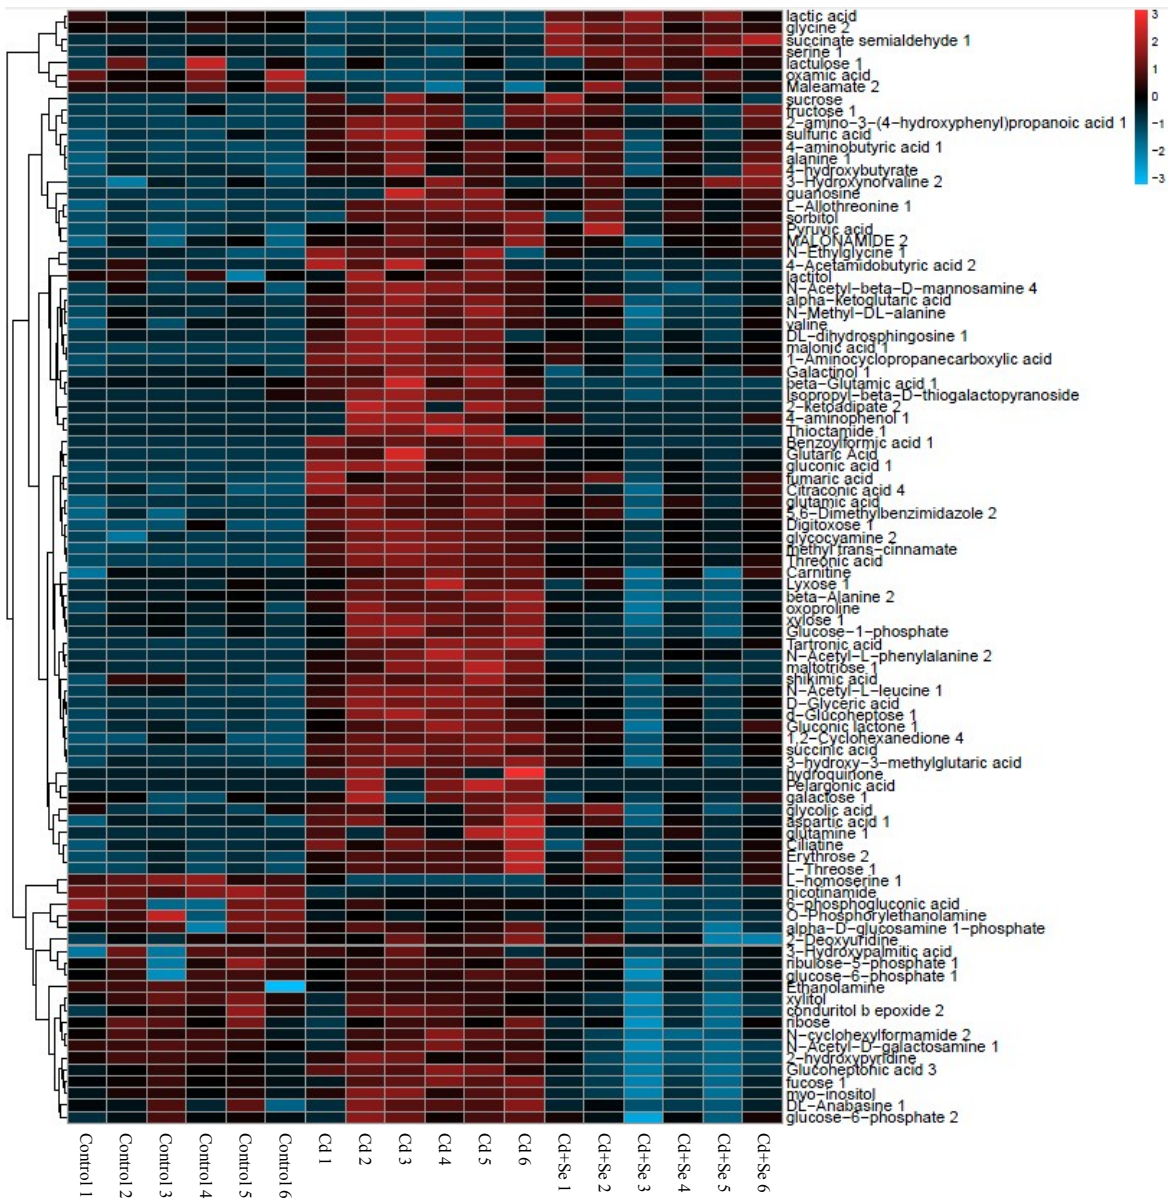

**Fig. S2** Heatmap analysis of all significantly changed metabolites under Cd and/or Se treatments.

(a): leaves; (b): roots.

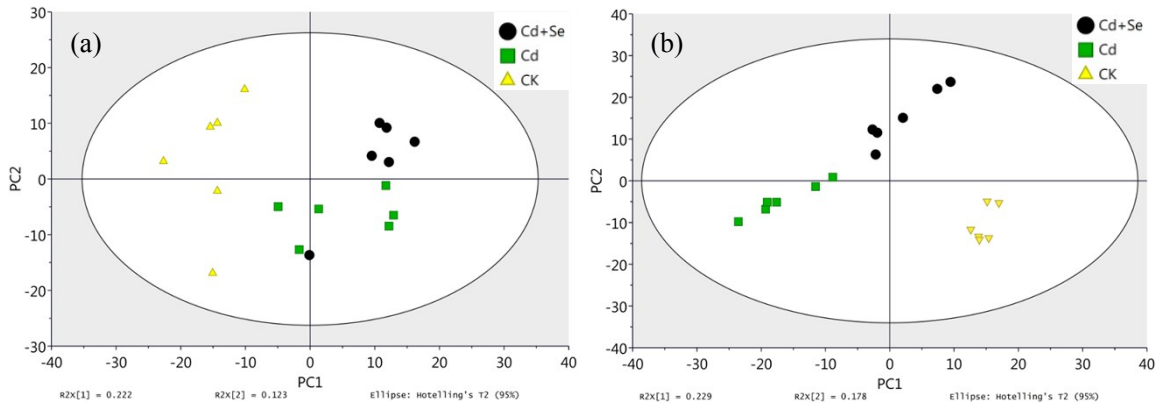

**Fig. S3** Principal component analysis (PCA) of metabolic profiles in leaves (a) and roots (b) of cucumber seedlings under control, Cd and Cd+Se conditions (six biological replicates). CK: control; PC1, the first principal component; PC2, the second principal component.

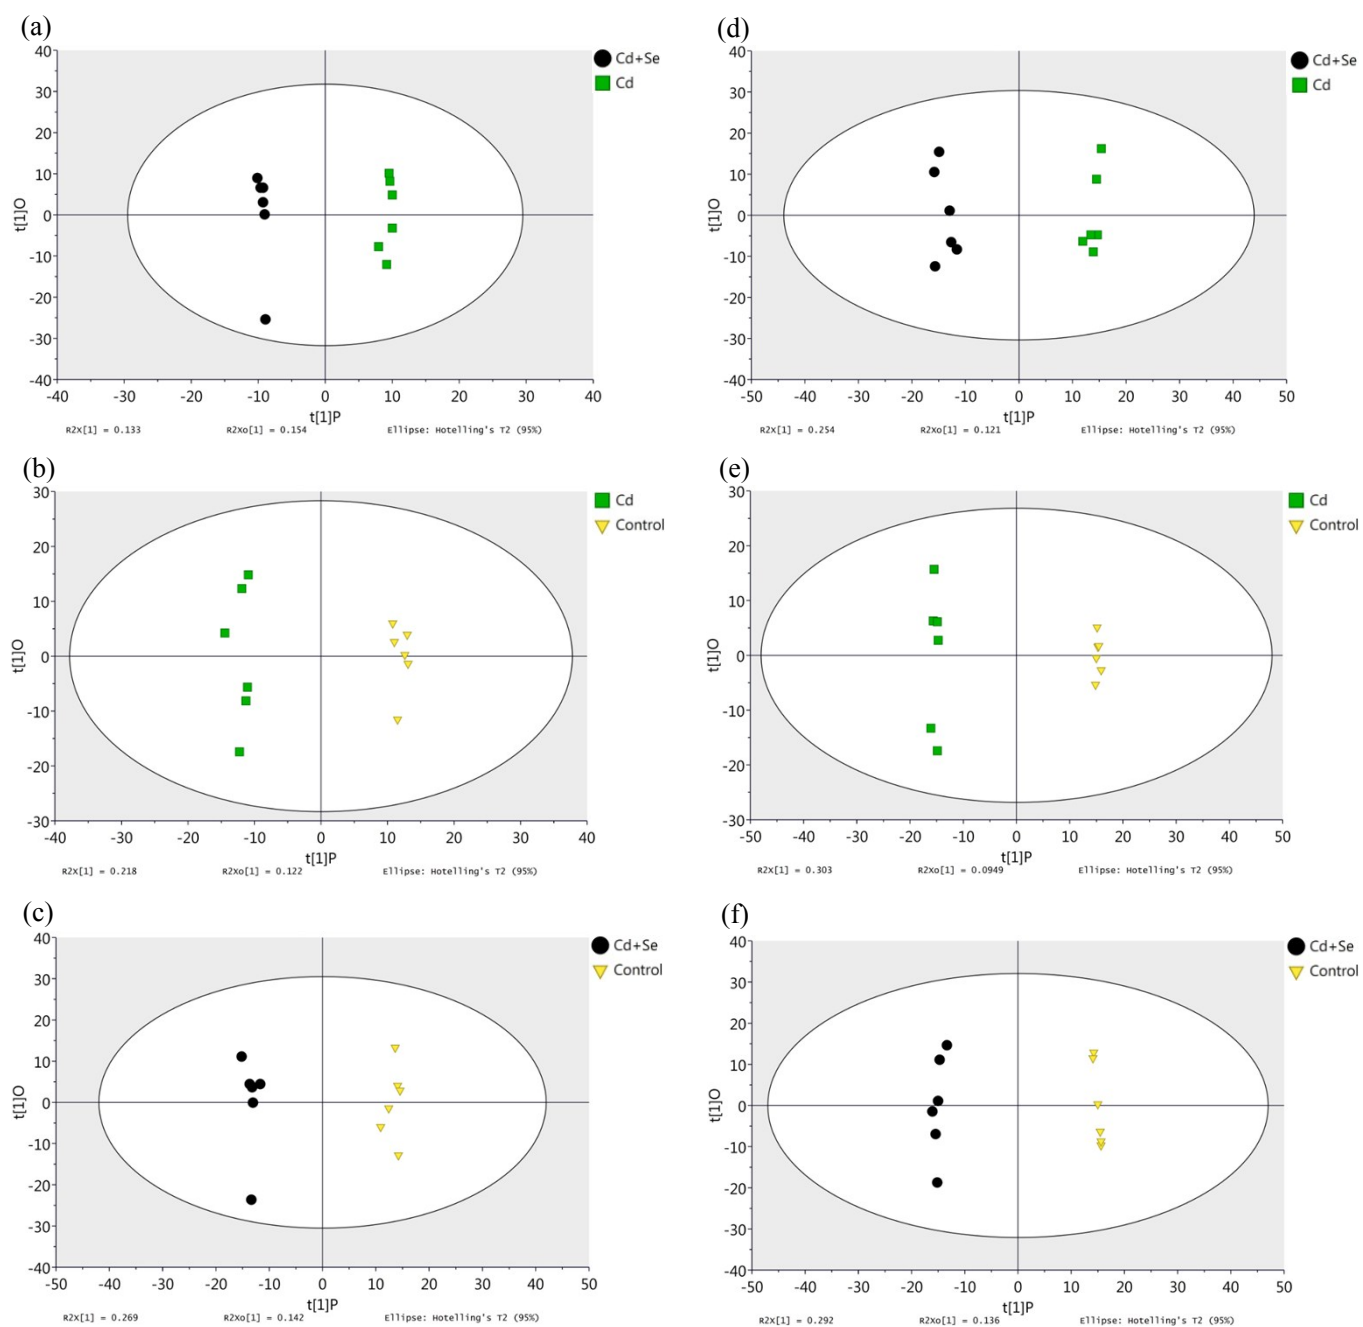

**Fig. S4** OPLS-DA score map derived from the GC-TOF/MS metabolite profiles in leaves (a-c) and roots (d-f) of cucumber seedlings.

Black represents contents from control group, green represents contents from Cd treatment group, and yellow represents contents from Cd+Se treatment group (n = 6).

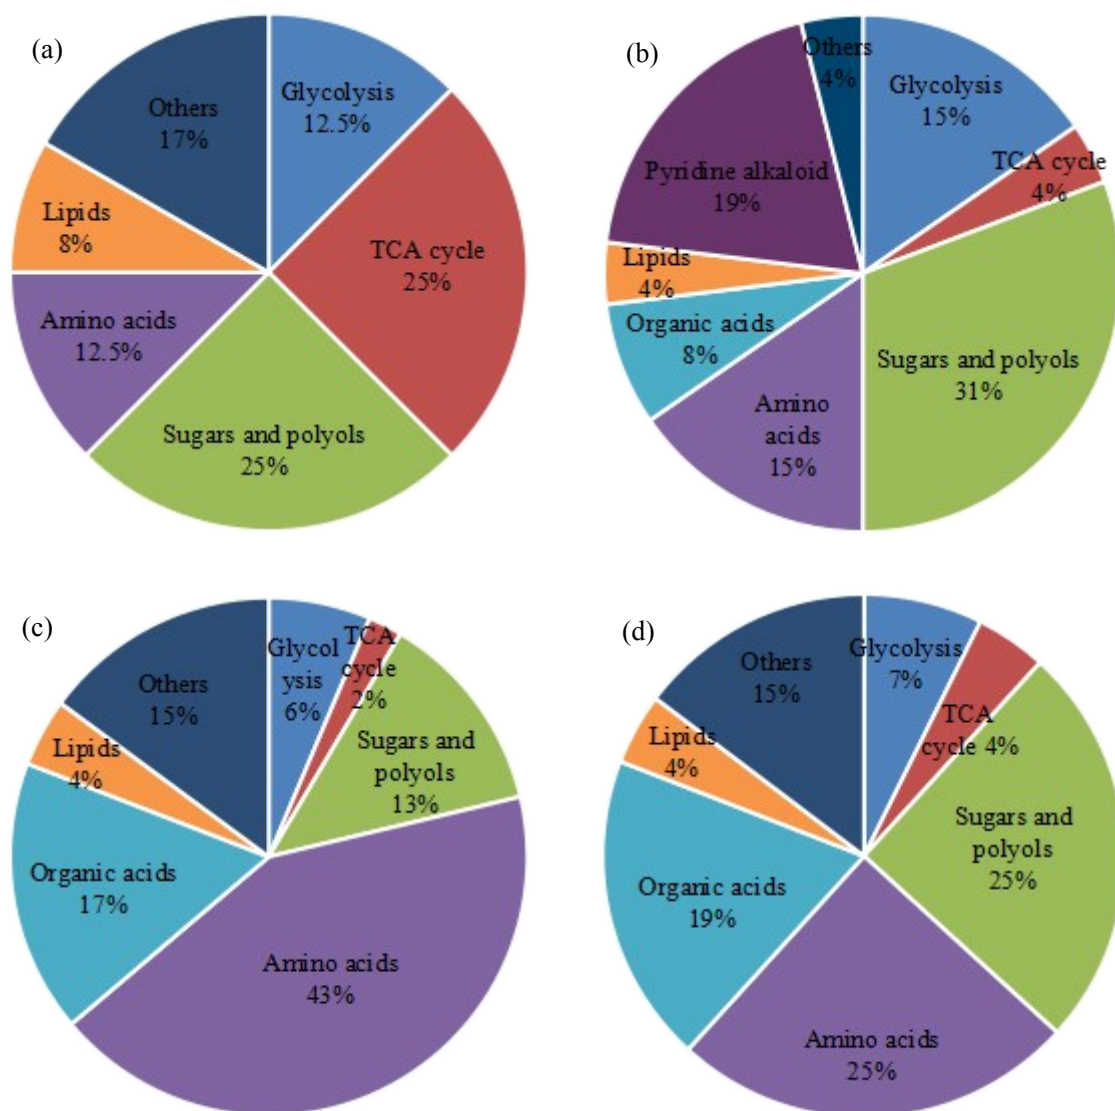

**Fig. S5** Functional classification of identified significantly different expression metabolites.

(a) and (b) down-accumulated in Cd-treated and up-accumulated or no-changed in Cd+Se leaves and roots, respectively (as shown in Table 1 and 2), (c) and (d) up-accumulated ( $\geq 1.5$ ) in Cd-treated leaves and roots, respectively (as shown in Table 3 and 4). The digits in the graphs indicate the percentage of the identified metabolites.
